# Supplementary material
Source: PubMed Central journal article supplement (PMC7485556)
Supplement: NIHMS1585622-supplement-1585622_Supp_info.pdf [file NIHMS1585622-supplement-1585622_Supp_info.pdf]

**Supplementary Information for “Genome-wide meta-analysis of problematic alcohol use  
in 435,563 individuals yields insights into biology and relationships with other traits”**

Hang Zhou, Julia M. Sealock, Sandra Sanchez-Roige, Toni-Kim Clarke, Daniel F. Levey,  
Zhongshan Cheng, Boyang Li, Renato Polimanti, Rachel L. Kember, Rachel Vickers Smith,  
Johan H. Thygesen, Marsha Y. Morgan, Stephen R. Atkinson, Mark R. Thursz, Mette Nyegaard,  
Manuel Mattheisen, Anders D. Børglum, Emma C. Johnson, the VA Million Veteran Program,  
Amy C. Justice, Abraham A. Palmer, Andrew McQuillin, Lea K. Davis, Howard J. Edenberg,  
Arpana Agrawal, Henry R. Kranzler, and Joel Gelernter

## **Million Veteran Program: Consortium Acknowledgement for Manuscripts**

### **MVP Executive Committee**

- Co-Chair: J. Michael Gaziano, M.D., M.P.H.
- Co-Chair: Rachel Ramoni, D.M.D., Sc.D.
- Jim Breeling, M.D. (ex-officio)
- Kyong-Mi Chang, M.D.
- Grant Huang, Ph.D.
- Sumitra Muralidhar, Ph.D.
- Christopher J. O'Donnell, M.D., M.P.H.
- Philip S. Tsao, Ph.D.

### **MVP Program Office**

- Sumitra Muralidhar, Ph.D.
- Jennifer Moser, Ph.D.

### **MVP Recruitment/Enrollment**

- Recruitment/Enrollment Director/Deputy Director, Boston – Stacey B. Whitbourne, Ph.D.; Jessica V. Brewer, M.P.H.
- MVP Coordinating Centers
  - o Clinical Epidemiology Research Center (CERC), West Haven – John Concato, M.D., M.P.H.
  - o Cooperative Studies Program Clinical Research Pharmacy Coordinating Center, Albuquerque - Stuart Warren, J.D., Pharm D.; Dean P. Argyres, M.S.
  - o Genomics Coordinating Center, Palo Alto – Philip S. Tsao, Ph.D.
  - o Massachusetts Veterans Epidemiology Research Information Center (MAVERIC), Boston - J. Michael Gaziano, M.D., M.P.H.
  - o MVP Information Center, Canandaigua – Brady Stephens, M.S.
- Core Biorepository, Boston – Mary T. Brophy M.D., M.P.H.; Donald E. Humphries, Ph.D.
- MVP Informatics, Boston – Nhan Do, M.D.; Shahpoor Shayan
- Data Operations/Analytics, Boston – Xuan-Mai T. Nguyen, Ph.D.

### **MVP Science**

- Genomics - Christopher J. O'Donnell, M.D., M.P.H.; Saiju Pyarajan Ph.D.; Philip S. Tsao, Ph.D.
- Phenomics - Kelly Cho, M.P.H, Ph.D.
- Data and Computational Sciences – Saiju Pyarajan, Ph.D.
- Statistical Genetics – Elizabeth Hauser, Ph.D.; Yan Sun, Ph.D.; Hongyu Zhao, Ph.D.

## **MVP Local Site Investigators**

- Atlanta VA Medical Center (Peter Wilson)
- Bay Pines VA Healthcare System (Rachel McArdle)
- Birmingham VA Medical Center (Louis Dellitalia)
- Cincinnati VA Medical Center (John Harley)
- Clement J. Zablocki VA Medical Center (Jeffrey Whittle)
- Durham VA Medical Center (Jean Beckham)
- Edith Nourse Rogers Memorial Veterans Hospital (John Wells)
- Edward Hines, Jr. VA Medical Center (Salvador Gutierrez)
- Fayetteville VA Medical Center (Gretchen Gibson)
- VA Health Care Upstate New York (Laurence Kaminsky)
- New Mexico VA Health Care System (Gerardo Villareal)
- VA Boston Healthcare System (Scott Kinlay)
- VA Western New York Healthcare System (Junzhe Xu)
- Ralph H. Johnson VA Medical Center (Mark Hamner)
- Wm. Jennings Bryan Dorn VA Medical Center (Kathlyn Sue Haddock)
- VA North Texas Health Care System (Sujata Bhushan)
- Hampton VA Medical Center (Pran Iruvanti)
- Hunter Holmes McGuire VA Medical Center (Michael Godschalk)
- Iowa City VA Health Care System (Zuhair Ballas)
- Jack C. Montgomery VA Medical Center (Malcolm Buford)
- James A. Haley Veterans' Hospital (Stephen Mastorides)
- Louisville VA Medical Center (Jon Klein)
- Manchester VA Medical Center (Nora Ratcliffe)
- Miami VA Health Care System (Hermes Florez)
- Michael E. DeBakey VA Medical Center (Alan Swann)
- Minneapolis VA Health Care System (Maureen Murdoch)
- N. FL/S. GA Veterans Health System (Peruvemba Sriram)
- Northport VA Medical Center (Shing Shing Yeh)
- Overton Brooks VA Medical Center (Ronald Washburn)
- Philadelphia VA Medical Center (Darshana Jhala)
- Phoenix VA Health Care System (Samuel Aguayo)
- Portland VA Medical Center (David Cohen)
- Providence VA Medical Center (Satish Sharma)
- Richard Roudebush VA Medical Center (John Callaghan)
- Salem VA Medical Center (Kris Ann Oursler)
- San Francisco VA Health Care System (Mary Whooley)
- South Texas Veterans Health Care System (Sunil Ahuja)
- Southeast Louisiana Veterans Health Care System (Amparo Gutierrez)

- Southern Arizona VA Health Care System (Ronald Schifman)
- Sioux Falls VA Health Care System (Jennifer Greco)
- St. Louis VA Health Care System (Michael Rauchman)
- Syracuse VA Medical Center (Richard Servatius)
- VA Eastern Kansas Health Care System (Mary Oehlert)
- VA Greater Los Angeles Health Care System (Agnes Wallbom)
- VA Loma Linda Healthcare System (Ronald Fernando)
- VA Long Beach Healthcare System (Timothy Morgan)
- VA Maine Healthcare System (Todd Stapley)
- VA New York Harbor Healthcare System (Scott Sherman)
- VA Pacific Islands Health Care System (Gwenevere Anderson)
- VA Palo Alto Health Care System (Philip Tsao)
- VA Pittsburgh Health Care System (Elif Sonel)
- VA Puget Sound Health Care System (Edward Boyko)
- VA Salt Lake City Health Care System (Laurence Meyer)
- VA San Diego Healthcare System (Samir Gupta)
- VA Southern Nevada Healthcare System (Joseph Fayad)
- VA Tennessee Valley Healthcare System (Adriana Hung)
- Washington DC VA Medical Center (Jack Lichy)
- W.G. (Bill) Hefner VA Medical Center (Robin Hurley)
- White River Junction VA Medical Center (Brooks Robey)
- William S. Middleton Memorial Veterans Hospital (Robert Striker)

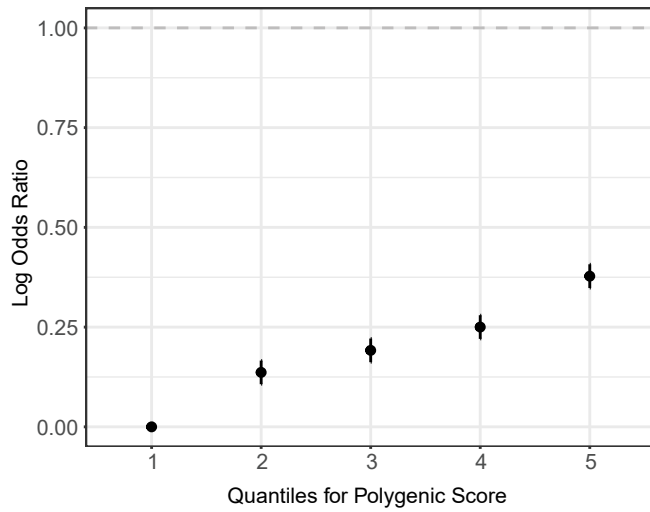

**Supplementary Figure 1. Quantiles for PRS of AUD meta-analysis associated with AUDIT-P in UKB.** Polygenic scores for AUD were calculated in 82,930 participants using PRSice-2, then split into 5 quantiles. Linear regression was applied to test the effect of increasing PRS on predicted risk of AUDIT-P (set quantile #1 as reference). The centre values are the coefficient and error bars are 95% confidence intervals.

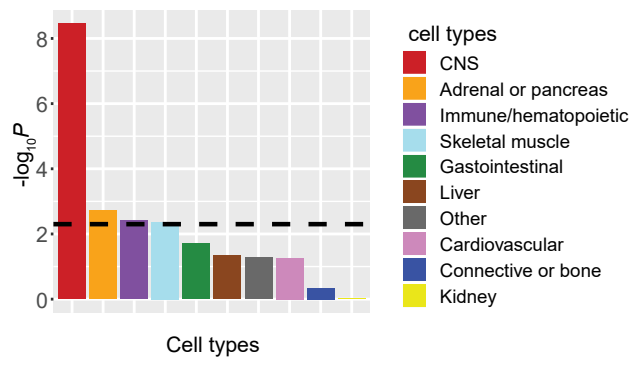

**Supplementary Figure 2. Cell type group partitioning heritability enrichment for PAU using LDSC.** The dashed line is the cutoff for Bonferroni-corrected significance ( $p < 0.005$ ). CNS: central nervous system.

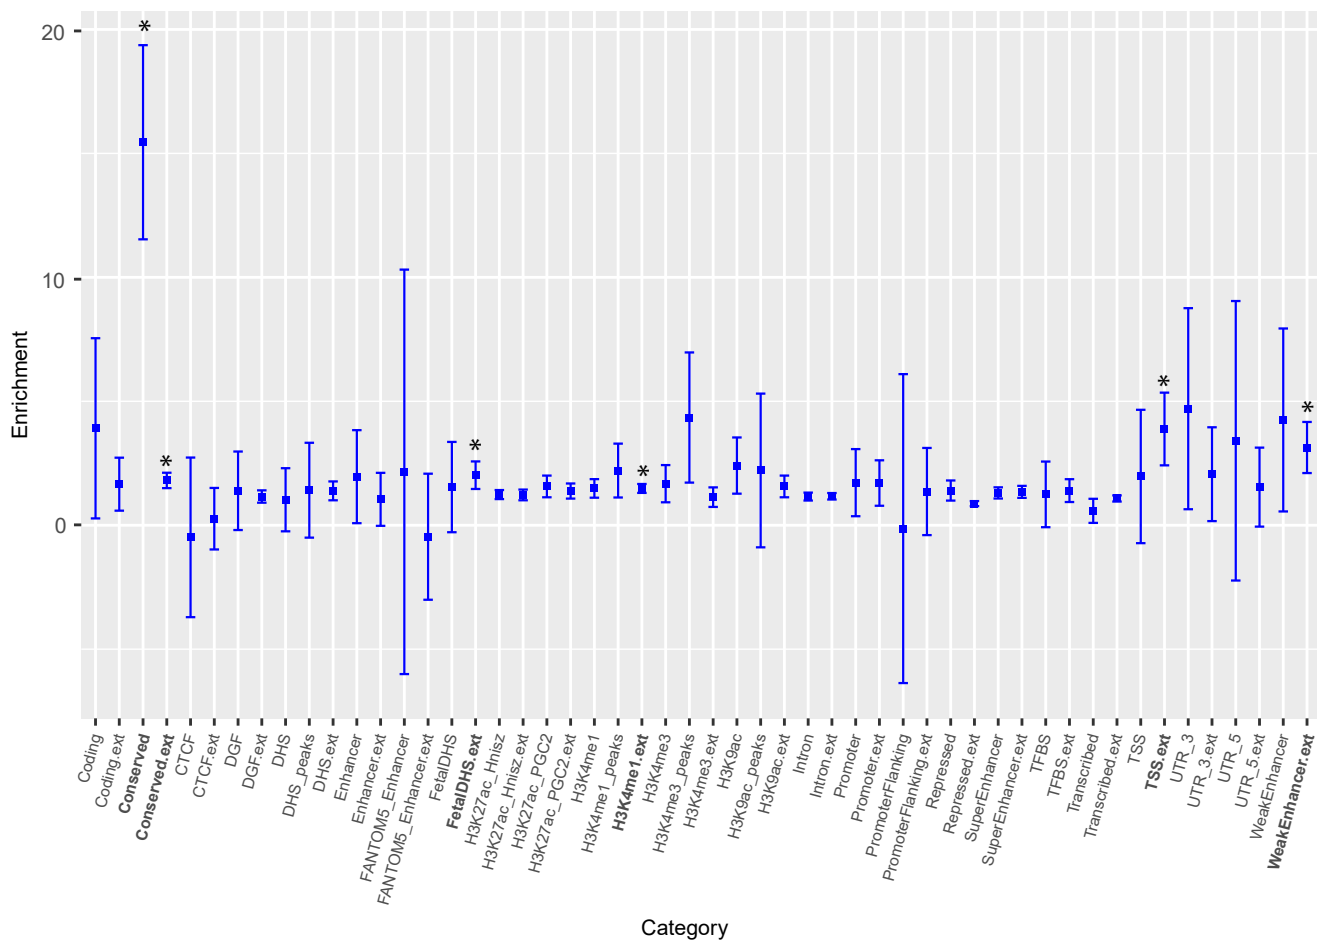

**Supplementary Figure 3. Functional category partitioning heritability enrichment for PAU using LDSC baseline model.** The categories labeled by asterisks are significant after Bonferroni correction ( $p < 9.62 \times 10^{-4}$ ). For each of the 24 main annotations, there is an annotation extended 500 bp (ext) from the original one. There are 4 annotations with 100bp windows around the peaks (peaks) from the original ones. Centre values are the enrichments and error bars indicate 95% confidence intervals.

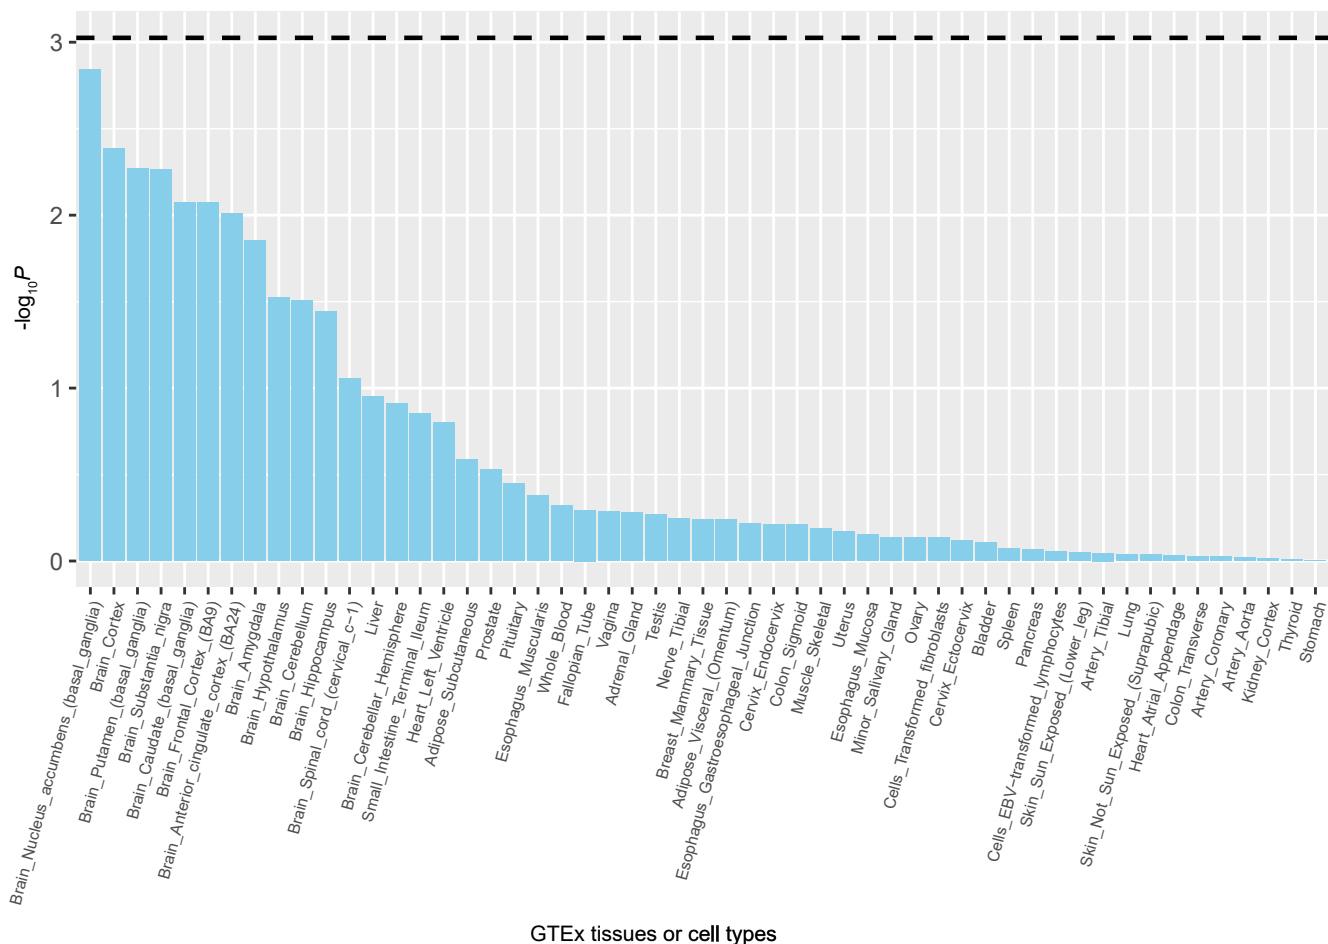

**Supplementary Figure 4. GTEx tissues or cell types partitioning heritability enrichment for PAU using LDSC.** The dashed line is the cutoff for Bonferroni-corrected significance ( $p < 9.43 \times 10^{-4}$ ).



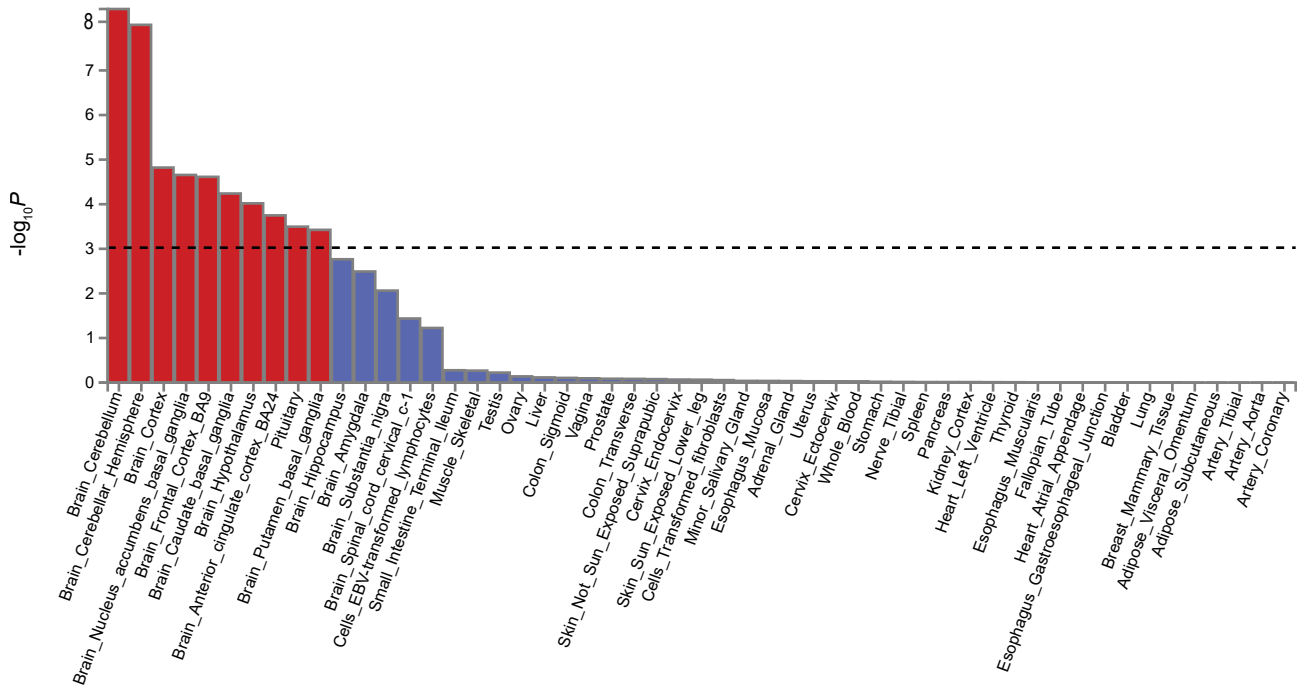

**Supplementary Figure 5. GTEx tissue expression enrichment using MAGMA.** The dashed line is the cutoff for Bonferroni-corrected significance ( $p < 9.43 \times 10^{-4}$ ).

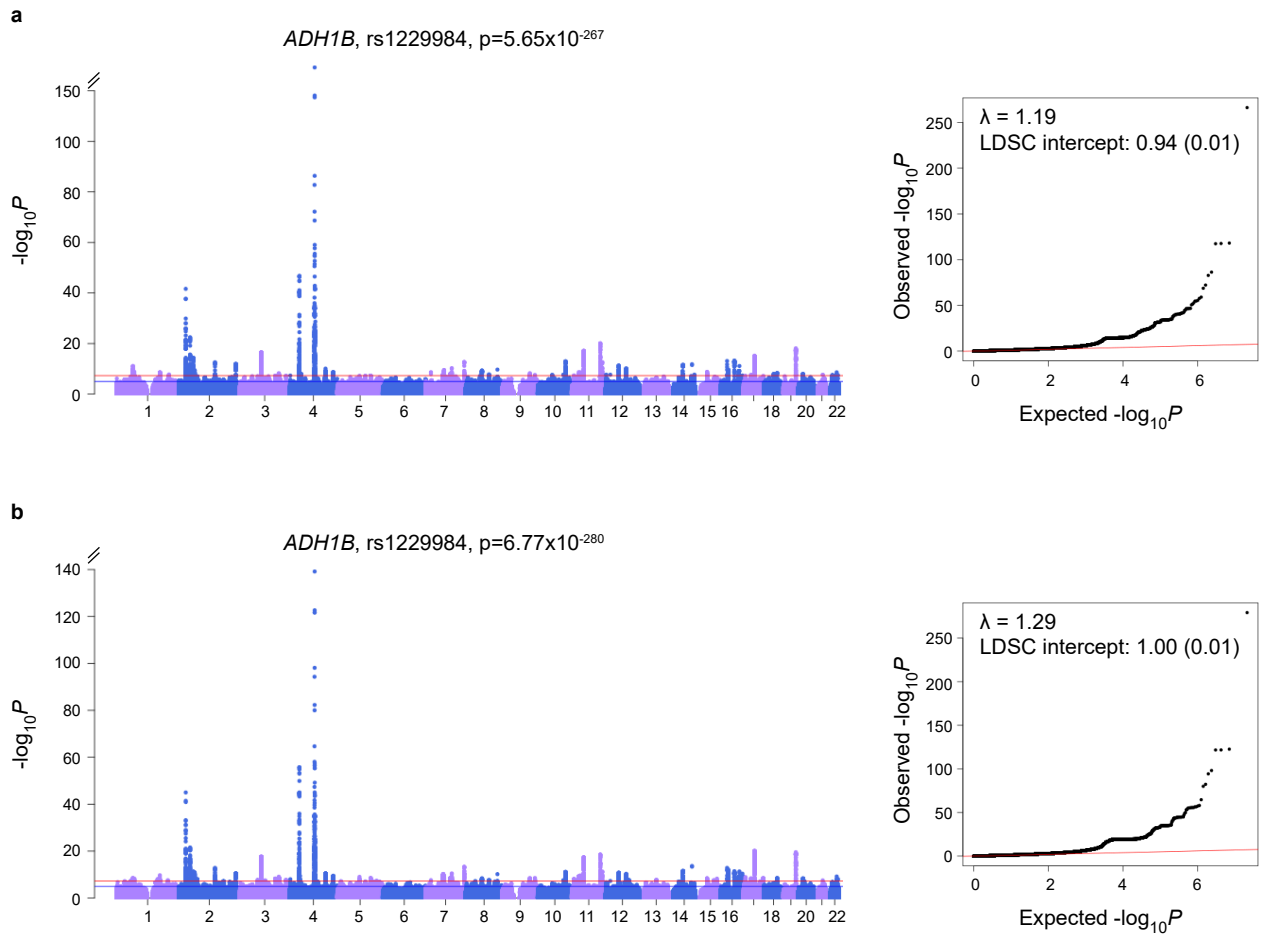

**Supplementary Figure 6. Manhattan and QQ plots for MTAG analysis.** Summary statistics from PAU ( $n=435,563$ ,  $n_{\text{effective}}=300,789$ ) and DrnkWk ( $n=537,352$ ) were analyzed by MTAG. Red lines indicate GWS after correction for multiple testing ( $p < 5 \times 10^{-8}$ ). a. MTAG results for PAU; b. MTAG results for DrnkWk.
